# Supplementary material for: CAl11−: a molecular rotor with a quasi-planar tetracoordinate carbon
Source: Royal Society of Chemistry journal article supplement (doi:10.1039/d3cc00855j), 2023-01-01
Supplement: d3cc00855j3.pdf [file d3cc00855j3.pdf]

## SUPPLEMENTARY INFORMATION

### CAI<sub>11</sub><sup>-</sup> : A molecular rotor with a quasi-planar tetracoordinate carbon

Li-Xia Bai,<sup>1</sup> Jorge Barroso,<sup>2</sup> Mesías Orozco-Ic,<sup>3</sup> Filiberto Ortiz-Chi,<sup>4</sup> Jin-Chang Guo,<sup>1\*</sup>  
and Gabriel Merino<sup>2\*</sup>

<sup>1</sup>*Nanocluster Laboratory, Institute of Molecular Science, Shanxi University, Taiyuan 030006, China.*

<sup>2</sup>*Departamento de Física Aplicada, Centro de Investigación y de Estudios Avanzados, Unidad Mérida. Km 6 Antigua Carretera a Progreso. Apdo. Postal 73, Cordemex, 97310, Mérida, Yuc., México.*

<sup>3</sup>*Department of Chemistry, Faculty of Science, University of Helsinki, P.O. Box 55, A. I. Virtasen aukio 1, FIN-00014, Helsinki, Finland.*

<sup>4</sup>*CONACYT-División Académica de Ciencias Básicas, Universidad Juárez Autónoma de Tabasco, Cunduacán 86690, Tabasco, México.*

\*E-mail: E-mail: [guojc@sxu.edu.cn](mailto:guojc@sxu.edu.cn) and [gmerino@cinvestav.mx](mailto:gmerino@cinvestav.mx)

### MOVIE

The short movies extracted from the BOMD simulations for the global minimum structure of CAI<sub>11</sub><sup>-</sup>. The simulations were performed at 500 K for over 30 ps; and the movies roughly cover a time span of 8 ps.

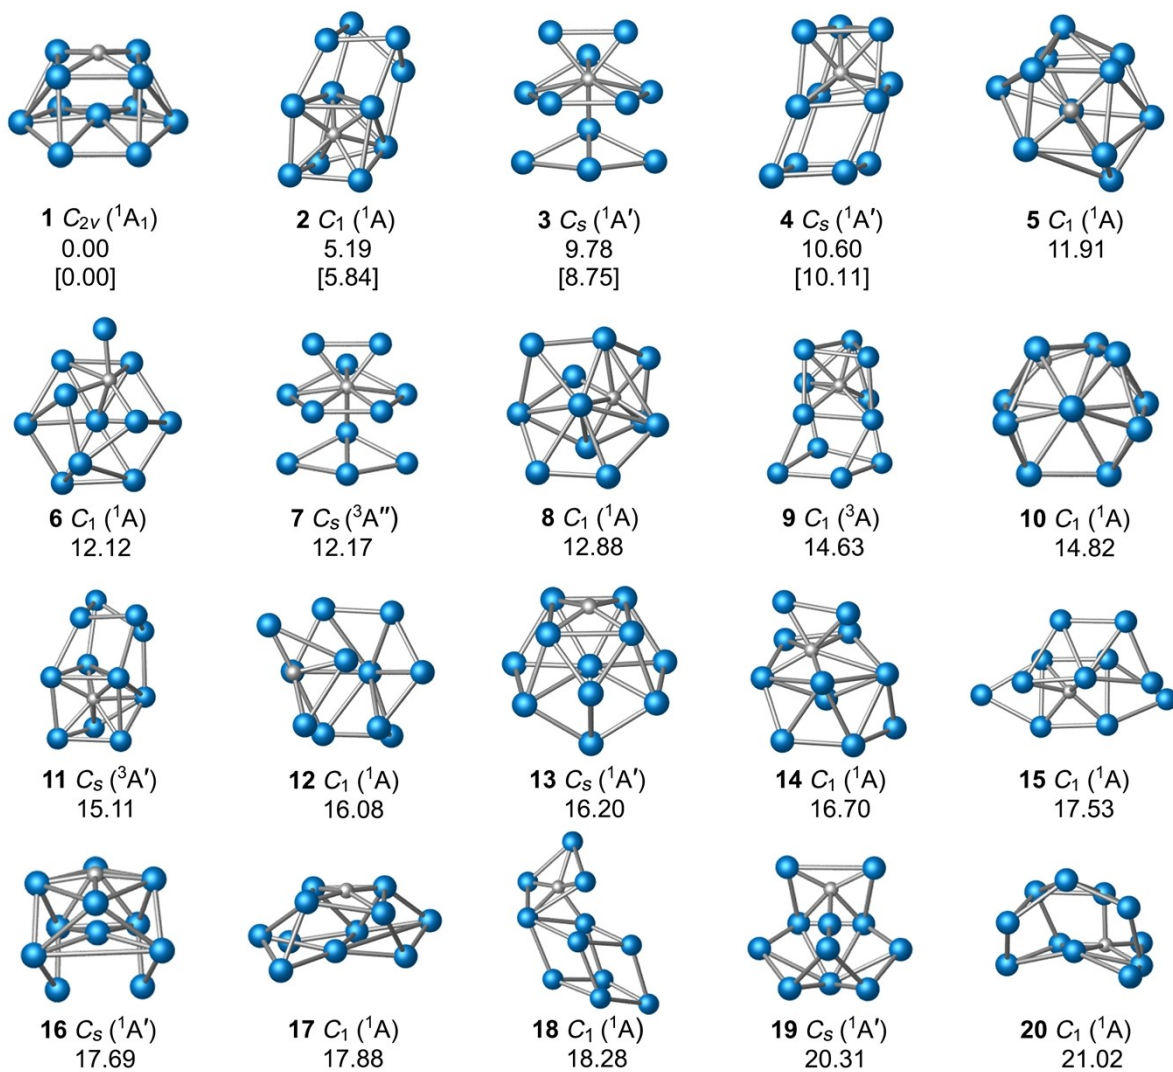

**Figure S1.** PBE0/def2-QZVP structures for the 20 lowest-energy isomers of  $CA_{11}^-$ . The relative energies are computed at the PBE0/def2-QZVP level, including the ZPE computed at the same level. The single point energies of the first four isomers were recomputed at CCSD(T)/def2-QZVP//PBE0/def2-QZVP (in square brackets). Energies are in kcal mol<sup>-1</sup>.

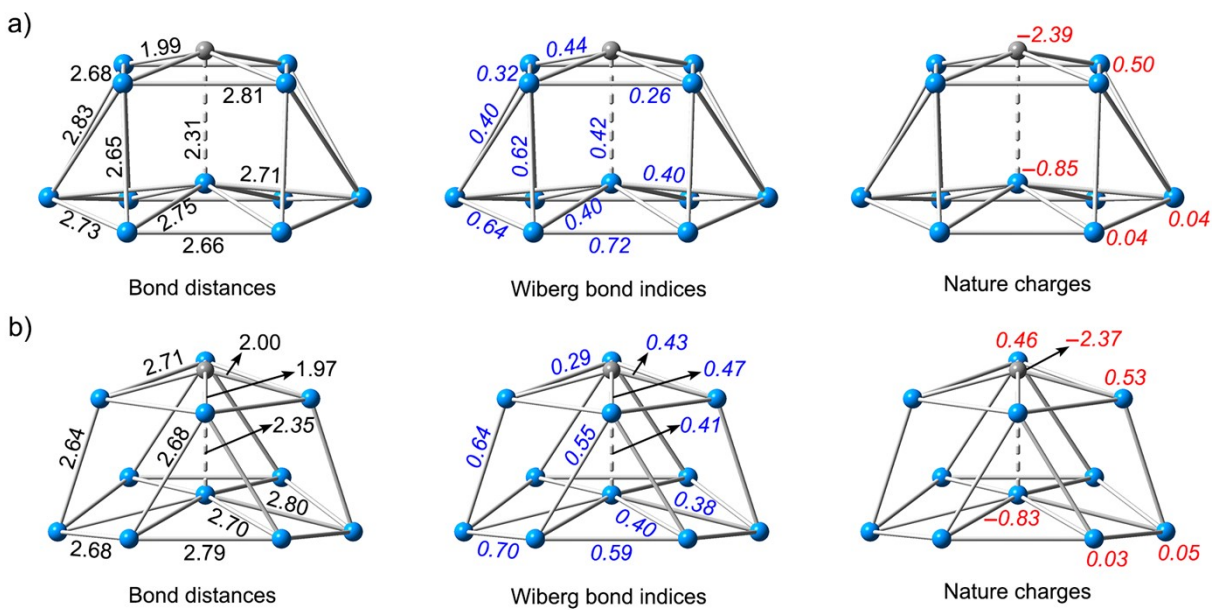

**Figure S2.** Computed bond lengths (in Å; black color), Wiberg bond indices (blue color), and natural atomic charges (in  $|e|$ ; red color) for **1** and **TS** structures.

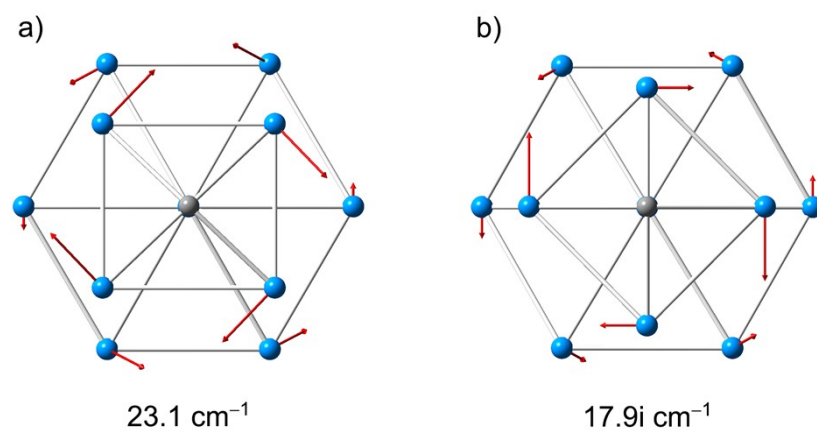

**Figure S3.** The lowest vibrational frequency of 1 and TS computed at the PBE0/def2-QZVP level.

**Cartesian coordinates at the PBE0/def2-QZVP level of structure 1 and the transition state**

**TS**

**1** ( $C_{2v}$ ,  $^1A_1$ )

|    |             |             |             |
|----|-------------|-------------|-------------|
| C  | 0.00000000  | 0.00000000  | -1.79357100 |
| Al | -1.33946100 | 1.40617000  | -1.37889900 |
| Al | -1.33946100 | -1.40617000 | -1.37889900 |
| Al | 1.33946100  | -1.40617000 | -1.37889900 |
| Al | 1.33946100  | 1.40617000  | -1.37889900 |
| Al | -2.34019700 | 1.33195900  | 1.07776100  |
| Al | -2.34019700 | -1.33195900 | 1.07776100  |
| Al | 0.00000000  | -2.69840500 | 0.75949500  |
| Al | 2.34019700  | -1.33195900 | 1.07776100  |
| Al | 2.34019700  | 1.33195900  | 1.07776100  |
| Al | 0.00000000  | 2.69840500  | 0.75949500  |
| Al | 0.00000000  | 0.00000000  | 0.51336300  |

**TS** ( $C_{2v}$ ,  $^1A_1$ )

|    |             |             |             |
|----|-------------|-------------|-------------|
| C  | 0.00000000  | 0.00000000  | -1.80017700 |
| Al | 0.00000000  | 1.92234800  | -1.25781000 |
| Al | -2.20698600 | 1.54338100  | 0.77378900  |
| Al | -1.93717500 | 0.03680400  | -1.47260300 |
| Al | 0.18000300  | 2.70245600  | 1.25339100  |
| Al | 1.93717500  | -0.03680400 | -1.47260300 |
| Al | 0.00000000  | -1.92234800 | -1.25781000 |
| Al | 2.38536200  | 1.24487800  | 0.84178900  |
| Al | 0.00000000  | 0.00000000  | 0.55373800  |
| Al | -0.18000300 | -2.70245600 | 1.25339100  |
| Al | 2.20698600  | -1.54338100 | 0.77378900  |
| Al | -2.38536200 | -1.24487800 | 0.84178900  |
